# Supplementary material
Source: MDPI journal article supplement (https://www.mdpi.com/2504-477X/7/9/393)
Supplement: s1 [file s1]

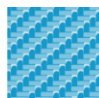

*Supporting information*

# Optimization of Isotactic Polypropylene Nanocomposite Content of Tungsten Carbide for Material Extrusion 3D Printing

Amalia Moutsopoulou <sup>1</sup>, Markos Petousis <sup>1</sup>, Nikolaos Michailidis <sup>2,3</sup>, Nikolaos Mountakis <sup>1</sup>, Apostolos Argyros <sup>2,3</sup>, Vassilis Papadakis <sup>4,5</sup>, Mariza Spiridaki <sup>1</sup>, Chrysa Charou <sup>1</sup>, Ioannis Ntintakis <sup>1</sup> and Nectarios Vidakis <sup>1,\*</sup>

<sup>1</sup> Department of Mechanical Engineering, Hellenic Mediterranean University, 71410 Heraklion, Greece; amalia@hmu.gr (A.M.); markospetousis@hmu.gr (M.P.); mountakis@hmu.gr (N.M.); mspyridakis@hmu.gr (M.S.); charou@hmu.gr (C.C.); ntintakis@hmu.gr (I.N.)

<sup>2</sup> Physical Metallurgy Laboratory, Mechanical Engineering Department, School of Engineering, Aristotle University of Thessaloniki, 54124 Thessaloniki, Greece; nmichail@auth.gr (N.M.); aargyros@auth.gr (A.A.)

<sup>3</sup> Centre for Research & Development of Advanced Materials (CERDAM), Center for Interdisciplinary Research and Innovation, Balkan Centre, 10th km Thessaloniki-Thermi road, 57001 Thessaloniki, Greece

<sup>4</sup> Department of Industrial Design and Production Engineering, University of West Attica, 12244 Athens, Greece; v.papadakis@uniwa.gr

<sup>5</sup> Institute of Electronic Structure and Laser of the Foundation for Research and Technology-Hellas (IESL-FORTH)—Hellas, 70013 Heraklion, Greece

\* Correspondence: vidakis@hmu.gr; Tel.: +30-28-1037-9227

## 2. Materials and Methods

Figure S1 shows the investigational process that was utilized to create the specimens for testing and the subsequent examination of their rheological, morphological, mechanical, and thermal characteristics.

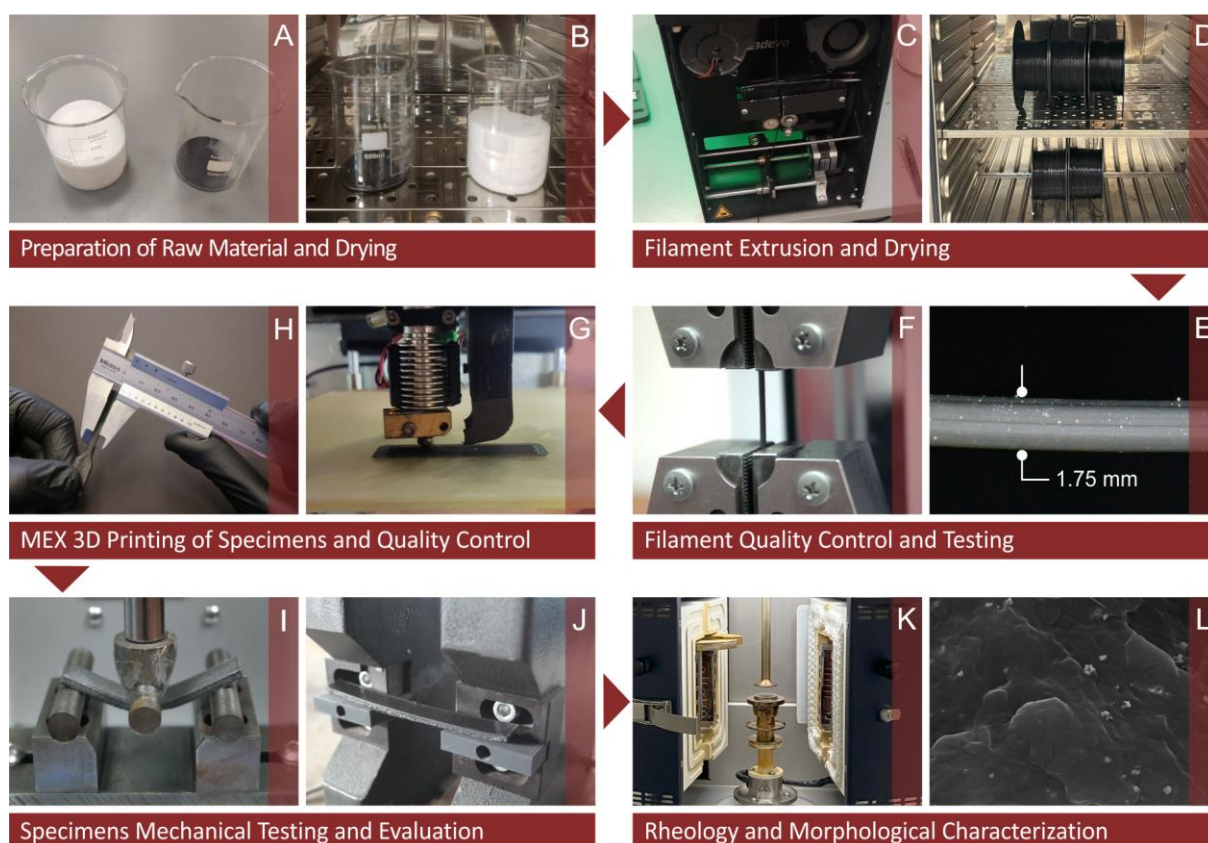

**Figure S1.** The experimental procedure's workflow: (A) raw materials; (B) drying process; (C) filament extrusion; (D) filament drying; (E) filament quality control; (F) filament mechanical testing; (G) samples 3D printing; (H) samples inspection; (I) samples mechanical testing (three-point-bending); (J) samples mechanical testing (impact test); (K) rheology testing; (L) morphological analysis with SEM.

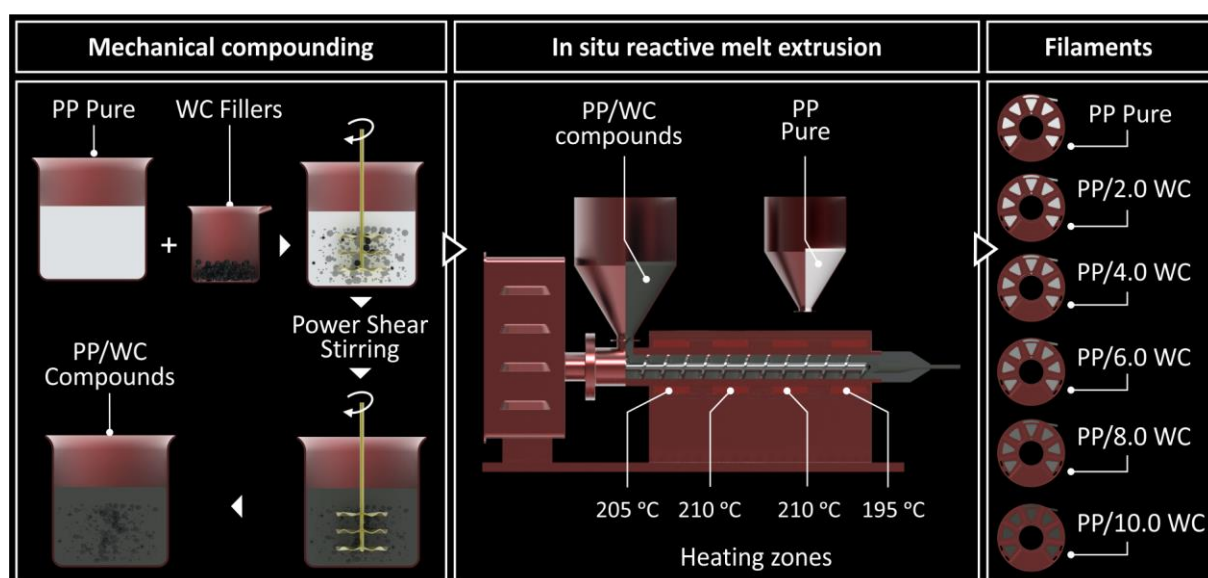

**Figure S2.** Schematic for the filament production process in the extruder.
